# Supplementary material for: Accumulation Pattern of Amygdalin and Prunasin and Its Correlation with Fruit and Kernel Agronomic Characteristics during Apricot (Prunus armeniaca L.) Kernel Development
Source: PubMed Central journal article supplement (PMC7918717; doi:10.3390/foods10020397), 2021-02-11
Supplement: foods-10-00397-s001.pdf [file foods-10-00397-s001.pdf]

Supplementary Materials:

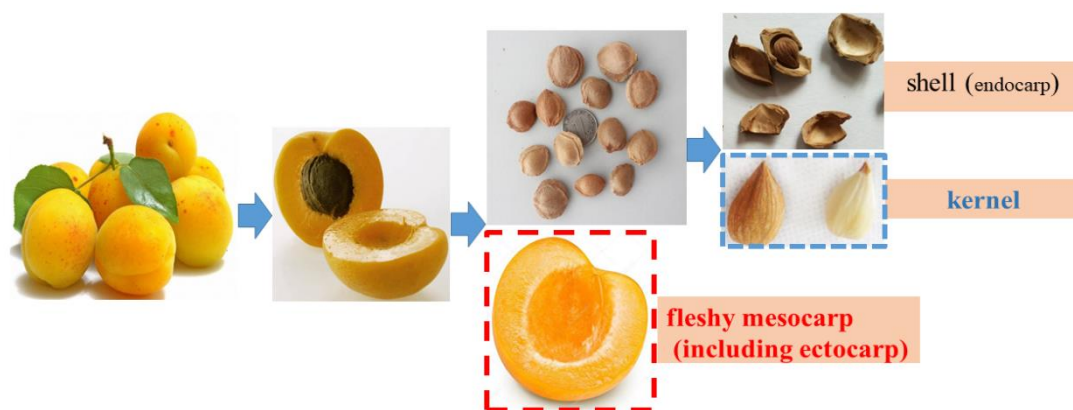

**Figure S1.** Apricot fruit processing diagram. The dotted frames are two portions from fruit. The blue dotted frame represents the kernels. The red dotted frame represents the fleshy mesocarp including ectocarp.

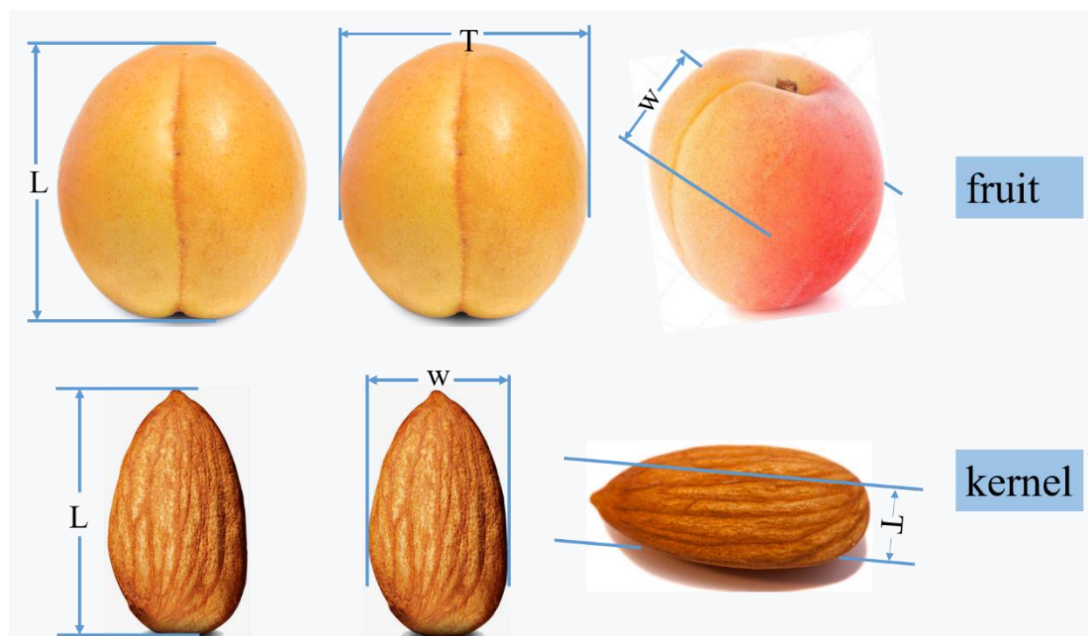

**Figure S2.** Length (L), width (W), and thickness (T) diagram of apricot fruits and kernels

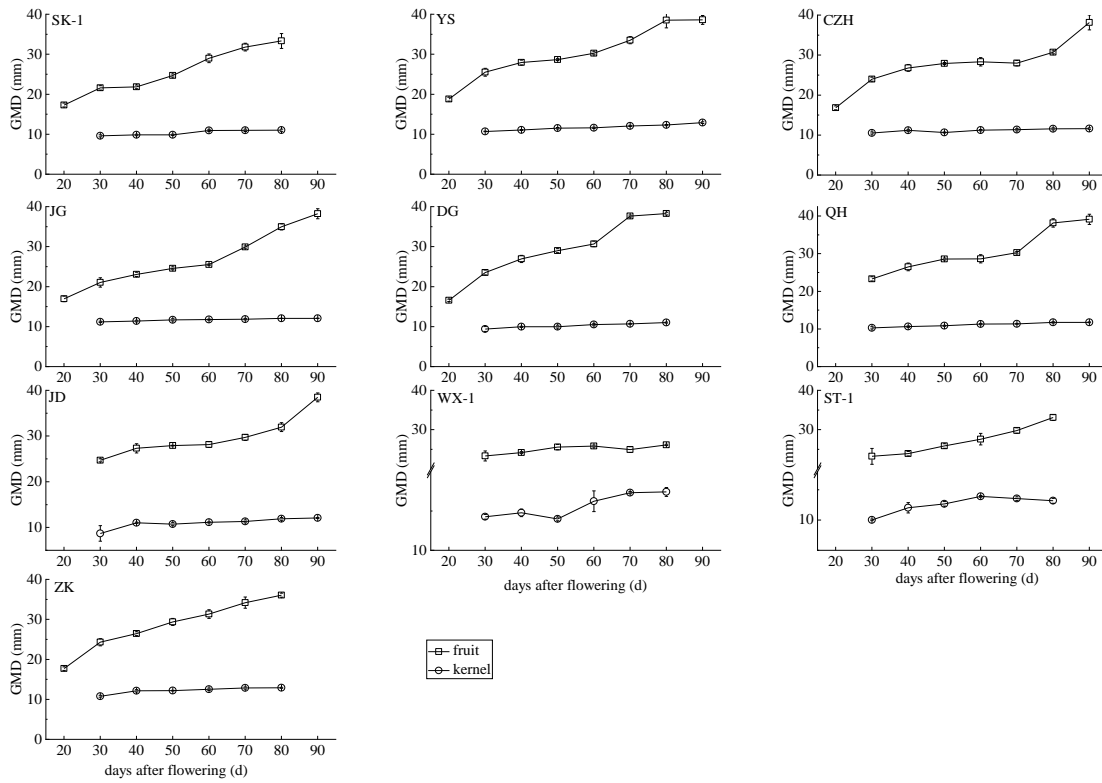

**Figure S3.** Changes in geometric mean diameter (GMD) during the development of fruits and kernels in ten apricot cultivars. Values are means  $\pm$  standard error ( $n = 3$ ).

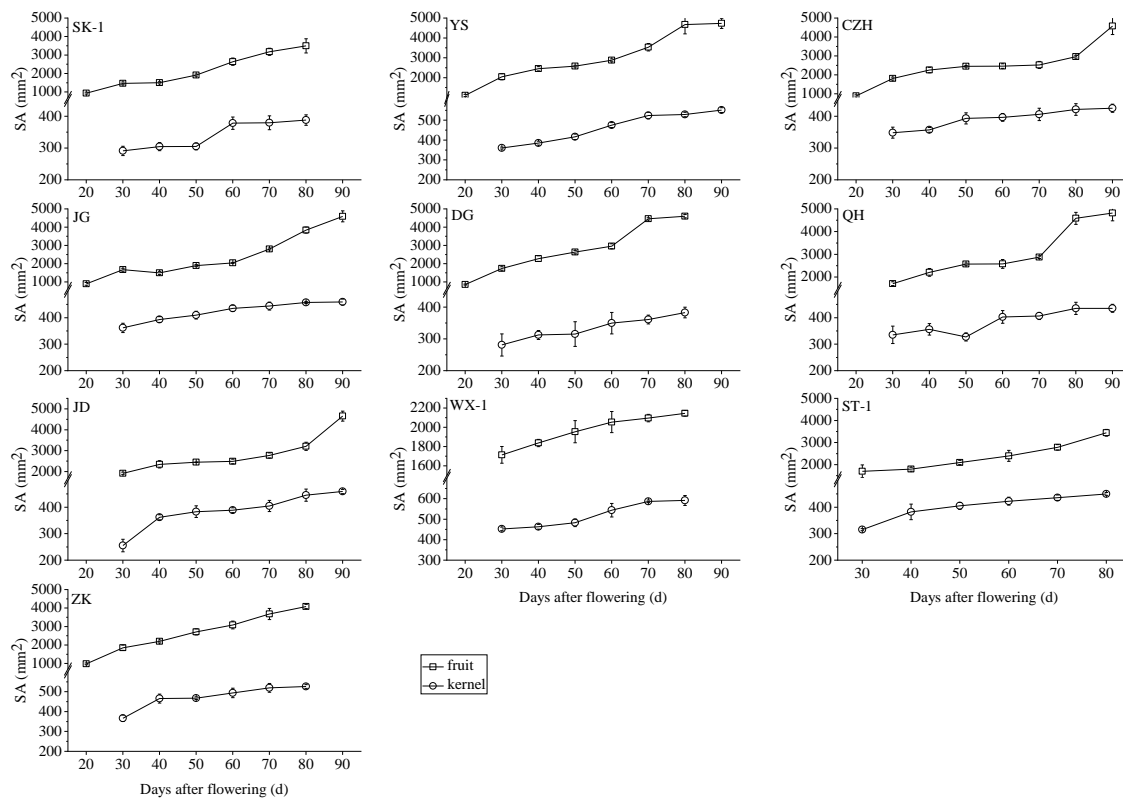

**Figure S4.** Changes in surface area (SA) during the development of fruits and kernels in ten apricot cultivars. Values are means  $\pm$  standard error ( $n=3$ ).

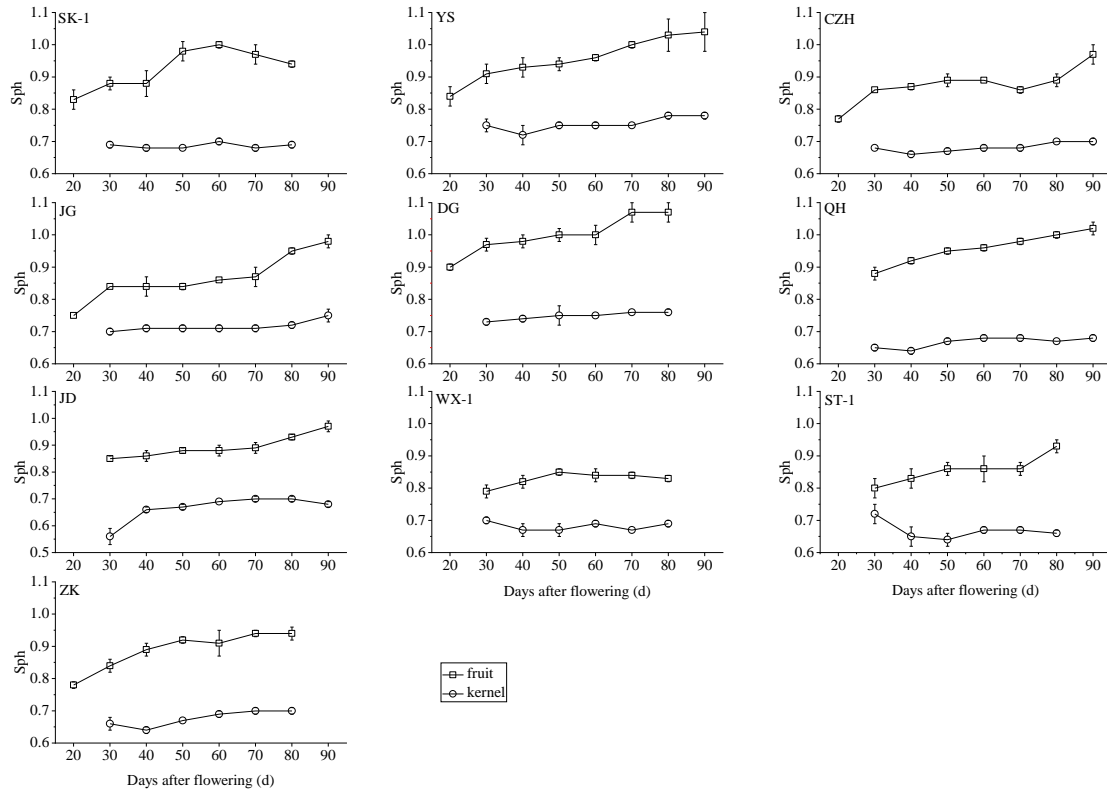

**Figure S5.** Changes in sphericity (Sph) during the development of fruits and kernels in ten apricot cultivars. Values are means  $\pm$  standard error (n=3).

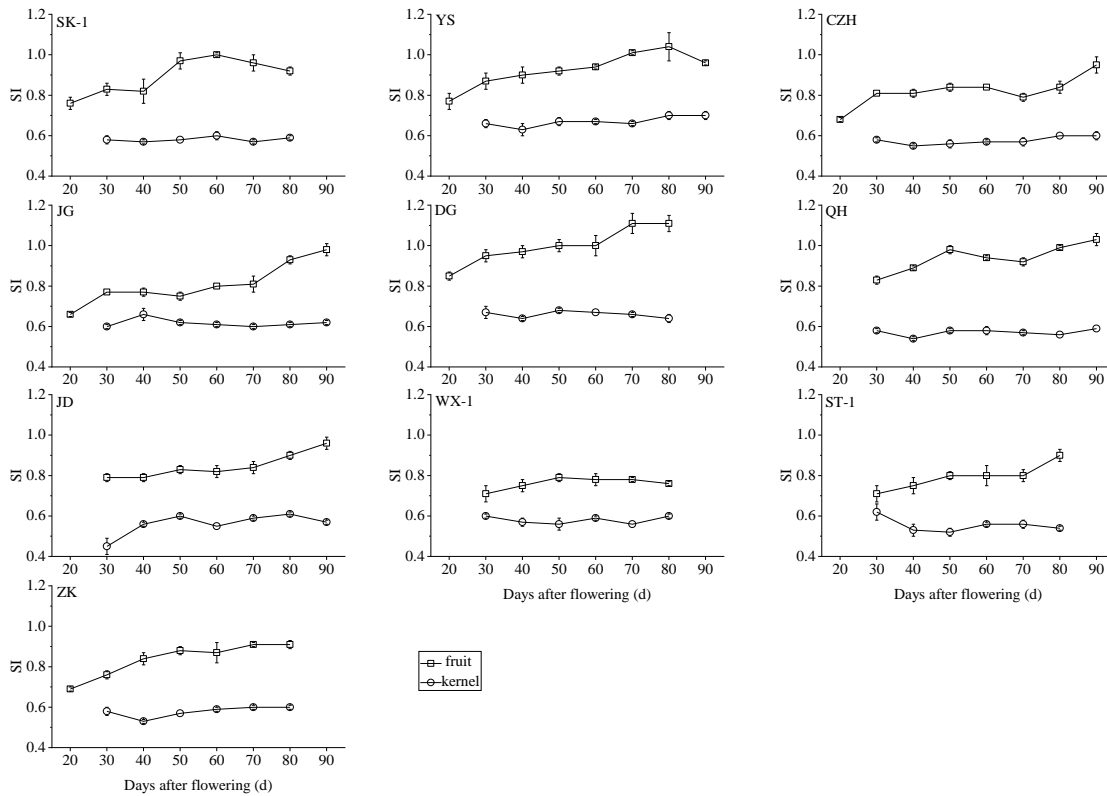

**Figure S6.** Changes in shape index (SI) during the development of fruits and kernels in ten apricot cultivars. Values are means  $\pm$  standard error (n=3).

**Table S1.** Changes in agronomic characteristics during the maturation of fruits and kernels in ten apricot cultivars.

| cultivar | Days after flowering (d) | L(mm)        |               | W(mm)       |               | T(mm)         |             | GMD(mm)      |               | SA(mm <sup>2</sup> ) |                 | Sph          |             | SI           |             |
|----------|--------------------------|--------------|---------------|-------------|---------------|---------------|-------------|--------------|---------------|----------------------|-----------------|--------------|-------------|--------------|-------------|
|          |                          | fruit        | kernel        | fruit       | kernel        | fruit         | kernel      | fruit        | kernel        | fruit                | kernel          | fruit        | kernel      | fruit        | kernel      |
| SK-1     | 20                       | 20.81±0.06e  | —             | 16.75±0.38e | —             | 14.91±0.4e    | —           | 17.32±0.48e  | —             | 942.79±52.09e        | —               | 0.83±0.03d   | —           | 0.76±0.03d   | —           |
|          | 30                       | 24.5±0.63d   | 13.99±0.49c   | 21.49±0.28d | 9.36±0.21b    | 19.18±0.15d   | 6.81±0.22ab | 21.61±0.53c  | 9.62±0.24b    | 1468.33±71.65d       | 291.32±14.61b   | 0.88±0.02c   | 0.69±0.01a  | 0.83±0.03c   | 0.58±0.02a  |
|          | 40                       | 24.97±0.64d  | 14.43±0.44c   | 21.53±0.93d | 9.48±0.24b    | 19.51±0.06d   | 6.98±0.05ab | 21.87±0.45c  | 9.85±0.20b    | 1503.28±61.51d       | 304.84±12.65b   | 0.88±0.04cd  | 0.68±0.01a  | 0.82±0.06cd  | 0.57±0.01a  |
|          | 50                       | 25.31±0.65d  | 14.48±0.29c   | 25.43±0.26c | 10.41±0.30ab  | 23.45±0.30c   | 6.36±0.19b  | 24.71±0.37c  | 9.85±0.17b    | 1918.07±57.64c       | 305.29±10.41b   | 0.98±0.03ab  | 0.68±0.00a  | 0.97±0.04ab  | 0.58±0.00a  |
|          | 60                       | 29.09±0.59c  | 15.78±0.43ab  | 30.53±0.71b | 11.67±0.68a   | 27.46±0.62b   | 7.18±0.04a  | 29.1±0.9b    | 10.97±0.28a   | 2644.59±198.46b      | 378.47±19.27a   | 1±0.01a      | 0.7±0.01a   | 1±0.01a      | 0.6±0.02a   |
|          | 70                       | 32.81±0.47b  | 16.21±0.42a   | 32±0.63b    | 11.71±0.45a   | 30.67±0.86a   | 7.33±0.29a  | 31.81±0.97a  | 10.99±0.31a   | 3180.31±194.89a      | 379.76±21.94a   | 0.97±0.03ab  | 0.68±0.01a  | 0.96±0.04ab  | 0.57±0.01a  |
| YS       | 80                       | 35.28±0.93a  | 16.19±0.55a   | 34.97±1.41a | 11.72±0.36a   | 30.04±0.94a   | 7.35±0.26a  | 33.34±1.85a  | 11.02±0.26a   | 3498.96±386.63a      | 338.07±16.52ab  | 0.94±0.01b   | 0.69±0.01a  | 0.92±0.02b   | 0.59±0.01a  |
|          | 20                       | 22.35±0.21e  | —             | 18±0.4f     | —             | 16.5±0.44f    | —           | 18.79±0.49f  | —             | 1109.95±57.38f       | —               | 0.84±0.03e   | —           | 0.77±0.04e   | —           |
|          | 30                       | 27.99±0.44d  | 14.31±0.37d   | 25.97±0.69e | 11.53±0.23d   | 22.87±0.74e   | 7.46±0.06d  | 25.52±0.97e  | 10.71±0.07f   | 2047.54±156.59e      | 360.50±4.74f    | 0.91±0.03d   | 0.75±0.02ab | 0.87±0.04d   | 0.66±0.02ab |
|          | 40                       | 29.92±0.28cd | 15.41±0.64abc | 28.5±0.84d  | 11.64±0.20cd  | 25.62±0.30d   | 7.58±0.22d  | 27.95±0.61d  | 11.07±0.14ef  | 2454.86±107.21d      | 385.26±9.83ef   | 0.93±0.03cd  | 0.72±0.03b  | 0.9±0.04cd   | 0.63±0.03b  |
|          | 50                       | 30.47±0.21c  | 15.32±0.48abc | 29.6±0.32cd | 12.22±0.08bcd | 26.17±0.61d   | 8.17±0.19c  | 28.68±0.23cd | 11.52±0.19de  | 2584.59±40.56cd      | 416.93±13.78de  | 0.94±0.02cd  | 0.75±0.01ab | 0.92±0.02cd  | 0.67±0.02ab |
|          | 60                       | 31.55±0.09bc | 15.38±0.17ab  | 31.11±0.54c | 12.45±0.18bc  | 28.26±0.35c   | 8.76±0.19b  | 30.27±0.37c  | 11.63±0.16cd  | 2878.8±71.08c        | 475.87±12.48c   | 0.96±0.01bcd | 0.75±0.01ab | 0.94±0.01bcd | 0.67±0.01ab |
| ZK       | 70                       | 33.4±0.49b   | 16.29±0.17a   | 34.17±0.77b | 12.83±0.18ab  | 33.07±0.35b   | 8.83±0.25b  | 33.54±0.90b  | 12.09±0.15bc  | 3536.23±187.9b       | 523.71±16.59b   | 1±0.01a      | 0.75±0.00ab | 1.01±0.01a   | 0.66±0.01ab |
|          | 80                       | 37.53±1.71a  | 16.86±0.32a   | 40.01±1.11a | 12.87±0.25ab  | 38.16±0.99a   | 8.85±0.21ab | 38.54±1.91a  | 12.31±0.16b   | 4673.23±463.82a      | 529.15±11.02b   | 1.03±0.05a   | 0.78±0.01a  | 1.04±0.07a   | 0.70±0.02a  |
|          | 90                       | 37.54±1.18a  | 16.90±0.20a   | 40.31±0.35a | 12.99±0.34a   | 38.24±0.95a   | 8.95±0.15a  | 38.61±1.1a   | 12.91±0.21a   | 4739.31±256.35a      | 551.16±11.97a   | 1.04±0.08a   | 0.78±0.01a  | 0.96±0.01bc  | 0.70±0.02a  |
|          | 20                       | 22.74±0.38e  | —             | 16.57±0.35f | —             | 14.76±0.22f   | —           | 17.71±0.43g  | —             | 986.19±47.58g        | —               | 0.78±0.01d   | —           | 0.69±0.01d   | —           |
|          | 30                       | 29.13±0.87d  | 15.74±0.19b   | 23.68±0.58e | 11.27±0.51c   | 20.84±0.52e   | 7.11±0.19b  | 24.31±0.91f  | 10.8±0.23c    | 1858.12±139.01f      | 366.61±15.92c   | 0.84±0.02c   | 0.69±0.02a  | 0.76±0.02c   | 0.58±0.02a  |
|          | 40                       | 29.81±0.13cd | 18.97±0.70a   | 25.43±0.33d | 12.69±0.30b   | 24.41±0.81d   | 7.5±0.18b   | 26.44±0.49e  | 12.17±0.3ab   | 2197.39±81.5e        | 466.11±22.44ab  | 0.89±0.02b   | 0.64±0.01b  | 0.84±0.03b   | 0.53±0.01b  |
| CZH      | 50                       | 31.89±0.76c  | 18.26±0.20a   | 28.79±0.44c | 13.49±0.20ab  | 27.63±0.37c   | 7.38±0.12b  | 29.38±0.88d  | 12.2±0.09ab   | 2713.52±161.49d      | 467.83±6.75ab   | 0.92±0.01ab  | 0.67±0.00ab | 0.88±0.02ab  | 0.57±0.00ab |
|          | 60                       | 34.47±1.28b  | 18.11±0.56a   | 30.58±0.74b | 13.12±0.44ab  | 29.23±0.37c   | 8.29±0.08a  | 31.34±1.08c  | 12.54±0.30a   | 3088.55±214.15c      | 494.23±23.85a   | 0.91±0.04ab  | 0.69±0.01a  | 0.87±0.05ab  | 0.59±0.01a  |
|          | 70                       | 36.51±1.02ab | 18.45±0.45a   | 34.1±0.49a  | 13.84±0.11a   | 32.15±0.94b   | 8.35±0.46a  | 34.21±1.42b  | 12.86±0.28a   | 3680.39±302.31b      | 519.92±22.28a   | 0.94±0.01a   | 0.7±0.01a   | 0.91±0.01a   | 0.6±0.01a   |
|          | 80                       | 38.44±0.52a  | 18.51±0.08a   | 34.27±0.27a | 13.85±0.33a   | 35.63±0.40a   | 8.37±0.51a  | 36.07±0.51a  | 12.93±0.13a   | 4088.14±114.43a      | 526.63±9.52a    | 0.94±0.02a   | 0.7±0.01a   | 0.91±0.02a   | 0.6±0.01a   |
|          | 20                       | 21.87±0.25e  | —             | 15.5±0.32f  | —             | 14.06±0.24e   | —           | 16.83±0.48e  | —             | 890.05±50.28e        | —               | 0.77±0.01d   | —           | 0.68±0.01d   | —           |
|          | 30                       | 27.75±0.38d  | 15.4±0.41c    | 23.96±0.21e | 10.91±0.43a   | 20.77±0.30d   | 6.79±0.13b  | 23.99±0.51d  | 10.53±0.26c   | 1808.85±76.66d       | 348.53±17.28c   | 0.86±0.0bc   | 0.68±0.00ab | 0.81±0.00bc  | 0.58±0.01ab |
| JG       | 40                       | 30.85±0.35c  | 16.88±0.18b   | 26.09±0.49d | 11.16±0.39a   | 23.94±0.67c   | 7.26±0.18ab | 26.81±0.87c  | 11.19±0.25abc | 2259.36±145.31c      | 357.38±7.39bc   | 0.87±0.01bc  | 0.66±0.01b  | 0.81±0.02bc  | 0.55±0.01b  |
|          | 50                       | 31.32±0.37c  | 15.91±0.16abc | 27.4±0.28cd | 11.22±0.24a   | 25.4±0.33c    | 6.99±0.13b  | 27.93±0.26c  | 10.66±0.11bc  | 2450.62±44.86c       | 393.45±17.4abc  | 0.89±0.02b   | 0.67±0.01ab | 0.84±0.02b   | 0.56±0.02ab |
|          | 60                       | 31.99±0.63c  | 16.01±0.29bc  | 28.06±0.77c | 11.43±0.57a   | 25.37±0.45c   | 7.53±0.16a  | 28.35±1.04c  | 11.23±0.17abc | 2467.1±117.52c       | 396.66±12.28abc | 0.89±0.00b   | 0.68±0.01ab | 0.84±0.00b   | 0.57±0.01ab |
|          | 70                       | 32.72±0.22bc | 16.63±0.14ab  | 27.2±0.59cd | 11.75±0.10a   | 24.71±0.34c   | 7.64±0.24a  | 28.02±0.67c  | 11.36±0.28ab  | 2526.57±184.12c      | 406.05±19.59ab  | 0.86±0.01c   | 0.68±0.01ab | 0.79±0.02c   | 0.57±0.02ab |
|          | 80                       | 34.48±0.64b  | 16.82±0.55ab  | 30.33±0.31b | 11.9±0.39a    | 27.7±0.29b    | 7.79±0.11a  | 30.71±0.35b  | 11.58±0.25a   | 2962.9±68.13b        | 421.68±18.37a   | 0.89±0.02b   | 0.7±0.00a   | 0.84±0.03b   | 0.6±0.05a   |
|          | 90                       | 38.47±2.24a  | 17.08±0.08a   | 35.36±2.75a | 12.13±0.39a   | 34.2±3.49a    | 7.81±0.17a  | 38.17±1.86a  | 11.63±0.18a   | 4584.45±452.55a      | 425.3±12.83a    | 0.97±0.03a   | 0.7±0.01a   | 0.95±0.04a   | 0.6±0.02a   |
| DG       | 20                       | 22.5±0.53f   | —             | 15.6±0.47f  | —             | 13.88±0.47e   | —           | 16.95±0.69d  | —             | 903.37±73.16e        | —               | 0.75±0.0b    | —           | 0.66±0.01d   | —           |
|          | 30                       | 27.6±0.4e    | 15.95±0.24ab  | 22.82±0.08e | 11.20±0.56c   | 19.53±0.44de  | 7.86±0.16bc | 21.05±1.17c  | 11.19±0.16cd  | 1674.34±75.19d       | 361.76±17.67d   | 0.84±0.0b    | 0.70±0.01b  | 0.77±0.0cd   | 0.60±0.01b  |
|          | 40                       | 29.36±0.39d  | 15.24±0.70b   | 24.42±0.11d | 11.97±0.09abc | 15.58±6.4cde  | 7.29±0.36c  | 23.08±0.52cd | 11.42±0.21bc  | 1500.04±85.5d        | 393.37±10.96cd  | 0.72±0.03ab  | 0.71±0.01ab | 0.77±0.02dc  | 0.66±0.03a  |
|          | 50                       | 29.41±0.29d  | 15.03±0.39b   | 24.97±0.06d | 11.29±0.47bc  | 20.74±0.38cde | 8.09±0.10ab | 24.59±0.36c  | 11.72±0.27bc  | 1899.52±55.32d       | 409.96±14.68bc  | 0.84±0.01ab  | 0.71±0.01ab | 0.75±0.02cd  | 0.62±0.01ab |
|          | 60                       | 29.61±0.11d  | 16.58±0.43a   | 25.15±0.19d | 12.17±0.16ab  | 22.31±0.15cd  | 8.16±0.23ab | 25.52±0.18bc | 11.77±0.16ab  | 2045.68±28.25d       | 435.65±11.81ab  | 0.86±0.04ab  | 0.71±0.01ab | 0.8±0.13bc   | 0.61±0.02ab |
|          | 70                       | 34.41±0.41c  | 16.72±0.17a   | 29.03±0.56c | 12.26±0.06a   | 26.81±0.21bc  | 8.18±0.29ab | 29.91±0.26b  | 11.89±0.2ab   | 2811.12±49.14c       | 444.3±14.92ab   | 0.87±0.03ab  | 0.71±0.01ab | 0.81±0.04bc  | 0.6±0.01b   |

|      |    |              |               |              |              |               |              |              |              |                  |                |             |             |             |             |
|------|----|--------------|---------------|--------------|--------------|---------------|--------------|--------------|--------------|------------------|----------------|-------------|-------------|-------------|-------------|
|      | 70 | 35.14±0.46a  | 14.37±0.49ab  | 38.39±0.43a  | 10.87±0.11ab | 39.66±0.53a   | 7.94±0.12a   | 37.67±0.25a  | 10.72±0.12a  | 4459.18±58.04a   | 361.24±13.96ab | 1.07±0.03a  | 0.76±0.00a  | 1.11±0.05a  | 0.66±0.01a  |
|      | 80 | 35.69±0.65a  | 14.58±0.15a   | 38.66±0.24a  | 11.08±0.21a  | 40.69±0.24a   | 8.33±0.19a   | 38.29±0.35a  | 11.04±0.14a  | 4605.79±84.34a   | 383.03±16.72a  | 1.07±0.03a  | 0.76±0.01a  | 1.11±0.04a  | 0.64±0.02a  |
|      | 30 | 26.54±0.35d  | 15.13±0.32c   | 23.61±0.49d  | 10.41±0.44c  | 20.26±0.38e   | 6.99±0.18abc | 23.33±0.56d  | 10.32±0.29c  | 1709.86±81.88d   | 335.39±32.92c  | 0.88±0.02f  | 0.65±0.01a  | 0.83±0.02f  | 0.58±0.01a  |
|      | 40 | 28.75±0.54c  | 16.23±0.38bc  | 27.11±0.76c  | 11.39±0.40bc | 23.92±0.5d    | 6.42±0.05c   | 26.52±1.03c  | 10.64±0.19c  | 2210.96±170.26c  | 356.21±21.60c  | 0.92±0.01e  | 0.64±0.01b  | 0.89±0.01e  | 0.54±0.01b  |
|      | 50 | 29.12±0.34c  | 16.52±0.47b   | 29.48±0.51b  | 12.08±0.18ab | 26±0.57b      | 6.58±0.28bc  | 28.61±0.27b  | 10.89±0.13bc | 2571.75±48.31b   | 372.44±15.42bc | 0.95±0.01c  | 0.67±0.01ab | 0.98±0.02d  | 0.58±0.01a  |
| QH   | 60 | 30.29±0.83b  | 16.77±0.33ab  | 29.9±0.58b   | 12.12±0.33ab | 27.3±0.5c     | 6.92±0.12abc | 28.66±1.09b  | 11.33±0.19ab | 2582.9±193.63b   | 403.18±23.68ab | 0.96±0.01bc | 0.68±0.01a  | 0.94±0.01cd | 0.58±0.02a  |
|      | 70 | 31.54±0.17bc | 16.62±0.26b   | 31.42±0.34b  | 12.28±0.64ab | 28.03±0.13bc  | 7.18±0.19ab  | 30.28±0.31b  | 11.38±0.11ab | 2881.3±59.25b    | 406.82±13.53ab | 0.98±0.01b  | 0.68±0.01a  | 0.92±0.02bc | 0.57±0.01a  |
|      | 80 | 38.35±0.44a  | 17.29±0.62ab  | 38.73±1.12a  | 12.83±0.30a  | 37.55±0.47a   | 7.25±0.28a   | 38.2±1.11a   | 11.77±0.18a  | 4588.01±266.05a  | 435.37±23.15a  | 1±0.01ab    | 0.67±0.00ab | 0.99±0.01ab | 0.56±0.04ab |
|      | 90 | 39.16±0.53a  | 17.95±0.18a   | 39.46±0.54a  | 13.15±0.37a  | 39.31±1.01a   | 7.36±0.14a   | 39.15±1.37a  | 11.78±0.12a  | 4819.03±339.4a   | 435.68±14.83a  | 1.02±0.02a  | 0.68±0.01a  | 1.03±0.03a  | 0.59±0.03a  |
|      | 30 | 29.06±0.5d   | 15.35±0.70b   | 24.27±0.23e  | 7.78±3.03b   | 21.44±0.15e   | 6.38±0.13d   | 24.73±0.33e  | 8.70±1.70b   | 1921.14±51.05e   | 255.63±23.61b  | 0.85±0.01d  | 0.56±0.03b  | 0.79±0.02d  | 0.45±0.09b  |
|      | 40 | 31.96±0.31c  | 16.62±0.36ab  | 26.45±0.53d  | 11.27±0.13ab | 24.18±0.83d   | 7.20±0.08abc | 27.34±1d     | 11.05±0.13a  | 2349.79±173.59d  | 362.18±22.05ab | 0.86±0.02d  | 0.67±0.01ab | 0.79±0.02d  | 0.56±0.01ab |
|      | 50 | 31.73±0.24c  | 15.30±0.51b   | 27.67±0.3d   | 11.36±0.13ab | 24.84±0.14d   | 7.11±0.34bc  | 27.93±0.07d  | 10.73±0.33ab | 2451.55±12.09d   | 383.39±9.37a   | 0.88±0.01cd | 0.66±0.00a  | 0.83±0.02cd | 0.60±0.01a  |
| JD   | 60 | 32.08±0.08c  | 15.91±0.36b   | 27.78±0.59d  | 11.69±0.64a  | 25.04±0.45cd  | 7.01±0.15c   | 28.15±0.61d  | 11.13±0.13a  | 2491±108.99d     | 389.05±8.87a   | 0.88±0.02cd | 0.69±0.01a  | 0.82±0.03cd | 0.55±0.00ab |
|      | 70 | 33.49±0.86bc | 17.61±0.05a   | 29.62±0.4c   | 12.12±0.21a  | 26.44±0.23c   | 7.48±0.06abc | 29.71±0.65c  | 11.34±0.30a  | 2773.97±122.19c  | 404.87±21.28a  | 0.89±0.02c  | 0.70±0.00ab | 0.84±0.28c  | 0.59±0.01a  |
|      | 80 | 34.3±0.44b   | 18.02±0.34a   | 31.55±0.77b  | 12.37±0.37a  | 30.19±0.6b    | 7.72±0.32ab  | 31.97±0.98b  | 11.90±0.31a  | 3212.62±196.64b  | 445.45±23.08a  | 0.93±0.01b  | 0.70±0.01a  | 0.9±0.02b   | 0.61±0.01a  |
|      | 90 | 39.68±0.83a  | 16.72±0.56ab  | 38.37±0.38a  | 12.9±0.15a   | 37.46±0.67a   | 7.79±0.17a   | 38.49±0.97a  | 12.09±0.10a  | 4656.65±236.36a  | 459.39±7.93a   | 0.97±0.02a  | 0.68±0.01a  | 0.96±0.03a  | 0.57±0.01a  |
|      | 30 | 29.41±0.31c  | 17.43±0.27c   | 23.35±0.92c  | 13.42±0.24a  | 18.51±0.85c   | 7.65±0.08ab  | 23.33±1.27c  | 12.14±0.15bc | 1713.79±86.98c   | 452.85±8.87c   | 0.79±0.02b  | 0.70±0.01a  | 0.71±0.04b  | 0.60±0.01a  |
|      | 40 | 29.39±0.36c  | 18.66±0.71abc | 24.97±0.2bc  | 13.79±0.26a  | 19.3±0.66bc   | 7.42±0.37b   | 24.18±0.25bc | 12.39±0.24bc | 1837.45±38.37bc  | 463.31±11.46bc | 0.82±0.02ab | 0.67±0.02a  | 0.75±0.03ab | 0.57±0.02a  |
| WX-1 | 50 | 29.61±0.63bc | 18.04±0.88bc  | 25.7±1.18b   | 12.34±0.17a  | 20.08±0.15abc | 7.79±0.13ab  | 25.57±0.68a  | 12.00±0.12c  | 1954.76±114.84ab | 482.78±18.63bc | 0.85±0.01a  | 0.67±0.02a  | 0.79±0.02a  | 0.56±0.03a  |
|      | 60 | 30.09±0.25bc | 18.95±1.22abc | 26.66±0.23a  | 14.12±0.70a  | 20.37±0.37ab  | 8.46±0.32ab  | 25.83±0.24a  | 13.13±0.66ab | 2054.78±109.98a  | 544.27±32.87ab | 0.84±0.02a  | 0.69±0.01a  | 0.78±0.03a  | 0.59±0.01a  |
|      | 70 | 30.76±0.43ab | 19.89±0.17ab  | 26.71±0.33a  | 14.18±0.24a  | 20.79±0.35ab  | 8.87±0.27a   | 25.94±0.73a  | 13.67±0.07a  | 2096.43±39.35a   | 587.32±6.06a   | 0.84±0.01a  | 0.67±0.00a  | 0.78±0.01a  | 0.56±0.00a  |
|      | 80 | 31.38±0.15a  | 20.52±0.30a   | 26.77±0.24a  | 14.38±0.16a  | 21.42±0.46a   | 8.94±0.10a   | 26.13±0.18a  | 13.72±0.28a  | 2145.76±29.06a   | 591.78±24.06a  | 0.83±0.01a  | 0.69±0.01a  | 0.76±0.01a  | 0.60±0.01a  |
|      | 30 | 29.09±0.93c  | 15.48±1.21a   | 21.62±1.23e  | 10.49±0.4ab  | 19.92±1.25c   | 6.67±0.31b   | 23.22±2.01e  | 10.02±0.06c  | 1701.8±286.26e   | 315.47±3.89c   | 0.8±0.03c   | 0.72±0.04a  | 0.71±0.04c  | 0.62±0.07a  |
|      | 40 | 28.97±0.28c  | 15.75±0.57a   | 22.63±0.62de | 10.80±0.54a  | 20.88±0.42c   | 7.76±0.45ab  | 23.91±0.58de | 11.02±0.43b  | 1797.47±86.97de  | 382.5±29.29b   | 0.83±0.03bc | 0.65±0.03a  | 0.75±0.04bc | 0.53±0.03a  |
| ST-1 | 50 | 30.13±0.17bc | 17.47±0.14a   | 24.18±0.21cd | 9.63±0.41b   | 23.75±0.78bc  | 8.04±0.09a   | 25.86±0.59cd | 11.35±0.18ab | 2101.61±95.35cd  | 405.22±13.13ab | 0.86±0.02b  | 0.64±0.02a  | 0.8±0.02b   | 0.52±0.02a  |
|      | 60 | 32.08±1.01b  | 17.60±0.86a   | 25.27±0.76c  | 11.31±0.06a  | 26.14±2.52b   | 8.23±0.73a   | 27.6±1.45c   | 11.97±0.07a  | 2397.48±249.25c  | 422.96±14.75ab | 0.86±0.04b  | 0.67±0.01a  | 0.8±0.07b   | 0.56±0.01a  |
|      | 70 | 34.75±1a     | 17.63±0.52a   | 28.53±0.16b  | 11.39±0.20a  | 26.65±0.27b   | 8.32±0.27a   | 29.78±0.68b  | 11.78±0.14a  | 2786.79±125.65b  | 436.31±10.20a  | 0.86±0.02b  | 0.67±0.01a  | 0.8±0.03b   | 0.56±0.02a  |
|      | 80 | 35.43±0.63a  | 17.8±0.39a    | 31.71±0.63a  | 11.01±0.24a  | 32.29±0.5a    | 8.52±0.14a   | 33.1±0.74a   | 11.60±0.20ab | 3443.08±153.97a  | 450.14±5.41a   | 0.93±0.02a  | 0.66±0.01a  | 0.9±0.03a   | 0.54±0.01a  |

Values are means ± standard error (n=3). Different letters corresponding to the different development stages for the same cultivars in the same column show significant differences according to ANOVA ( $p < 0.05$ ); Apricot cultivars: Shanku-1 (SK-1), Cuanzhihong (CZH), Zhengkui (ZK), Jiguang (JG), Jidan (JD), Yangshao (YS), Qiu hong (QH), Daguo (DG), Shantian-1 (ST-1), Weixuan-1 (WX-1); Wt: weight, L: length, W: width, T: thickness, GMD: geometric mean diameter, SA: surface area, Sph: sphericity, SI: shape index.
